# Supplementary material for: The SUPECA kinetics for scaling redox reactions in networks of mixed substrates and consumers and an example application to aerobic soil respiration
Source: Copernicus journal article supplement (doi:10.5194/gmd-2017-46), 2017-03-08
Supplement: Supplementary file 1 [file gmd-2017-46-supplement.pdf]

**Supplemental material to “The SUPECA kinetics for scaling redox reactions in networks of mixed substrates and consumers and an example application to aerobic soil respiration”**

J. Y. Tang and W. J. Riley

Earth and Environmental Sciences Area, Lawrence Berkeley National Laboratory,

Berkeley, CA, USA, 94720

Correspondence to: J. Y. Tang ([jinyuntang@lbl.gov](mailto:jinyuntang@lbl.gov))

Below we provide auxiliary information for the numerical benchmark of the SUPECA kinetics.

The equations for fixed-point iteration are

$$[S_1]_{new} = [S_1]_T \left( 1 + \frac{[M]_{old}}{K_{MS1}} + \frac{k_{BS1}[B]_{old}}{k_{BS2}[S_2]_{old}} + \frac{k_{BS2}[B]_{old}}{k_2^+} \frac{[S_2]_{old}}{[S_1]_{old}} + \frac{k_{BS1}[B]_{old}}{k_2^+} \right)^{-1} \quad (S-1)$$

$$[S_2]_{new} = [S_2]_T \left( 1 + \frac{k_{BS2}[B]_{old}}{k_{BS1}[S_1]_{old}} + \frac{k_{BS2}[B]_{old}}{k_2^+} + \frac{k_{BS1}[B]_{old}}{k_2^+} \frac{[S_1]_{old}}{[S_2]_{old}} \right)^{-1} \quad (S-2)$$

$$[B]_{new} = [B]_T \left( 1 + \frac{k_{BS1}[S_1]_{old}}{k_{BS2}[S_2]_{old}} + \frac{k_{BS2}[S_2]_{old}}{k_{BS1}[S_1]_{old}} + \frac{k_{BS2}[S_2]_{old}}{k_2^+} + \frac{k_{BS1}[S_1]_{old}}{k_2^+} \right)^{-1} \quad (S-3)$$

$$[M]_{new} = [M]_T \left( 1 + \frac{[S_1]_{old}}{K_{MS1}} \right)^{-1} \quad (S-4)$$

The iteration starts with initial condition  $[S_1]_{old} = [S_1]_T$ ,  $[S_2]_{old} = [S_2]_T$ ,  $[B]_{old} = [B]_T$ , and  $[M]_{old} = [M]_T$ . The iteration stops when the relative change between two consecutive iterations is smaller than  $10^{-4}$ .

### Supplementary figure

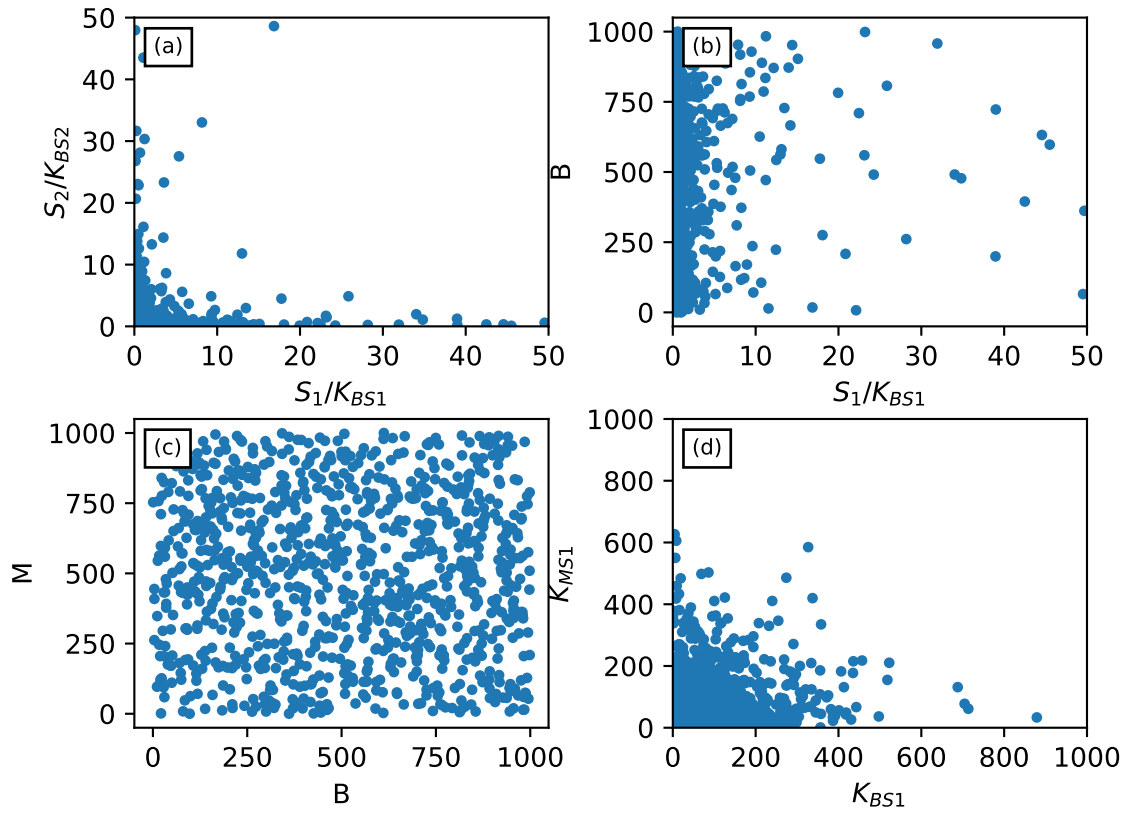

Figure S1. Scatter plots of the parameters used in the numerical benchmark of the SUPECA kinetics (which is Figure 4 in the main text).
